# Supplementary material
Source: Springer Nature journal article supplement (https://www.springermedizin.de/resource/supplementary/13030_2012_132_MOESM1_ESM.pdf/9644804)
Supplement: MOESM1 [file 9644804]

(i) ANYB session

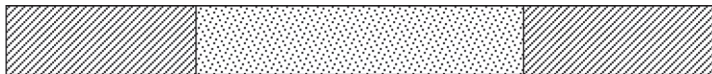

(ii) BAW session

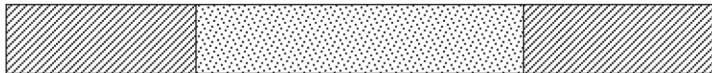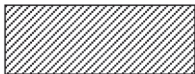

Before, After with recording of P300

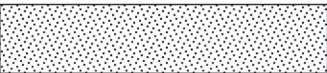

Intervention, either ANYB or BAW depending on whether it was session i or ii.
